# Supplementary material for: Intrinsic peroxidase-like activity of mesoporous nickel oxide for selective cysteine sensing
Source: Royal Society of Chemistry journal article supplement (doi:10.1039/c4tb00968a), 2014-07-18
Supplement: c4tb00968a1.pdf [file c4tb00968a1.pdf]

## **Electronic Supplementary Information**

### **Intrinsic Peroxidase-like Activity of Mesoporous Nickel Oxide for Selective Cysteine Sensing**

Chaiti Ray, Soumen Dutta, Sougata Sarkar, Ramkrishna Sahoo, Anindita Roy and Tarasankar  
Pal\*

Department of Chemistry, Indian Institute of Technology, Kharagpur – 721302, India

E-mail: *tpal@chem.iitkgp.ernet.in*

## S1. EXPERIMENTAL SECTION

### Materials

All the reagents were of analytical grade and used in the synthesis without further purification. Nickel acetate  $[\text{Ni}(\text{OCOCH}_3)_2 \cdot \text{H}_2\text{O}]$ , 3, 3', 5, 5' tetramethylbenzidine (TMB), cysteine, N-acetyl cysteine (NAC) were purchased from Sisco Research Laboratory, Mumbai, India. Ethanol amine,  $\text{H}_2\text{O}_2$  (30%) were purchased from Merck, Gurgaon, India. *Ortho*-phenylene diamine (OPDA) was acquired from Aldrich. All the glassware was washed with double distilled water and dried well before use. Double distilled water was used throughout the course of experiments.

### Instrumentations

**UV-Visible Spectroscopy:** All the absorbance spectra were recorded in a SPECTRASCAN UV 2600 digital spectrophotometer (Chemito, India) and absorbance was measured by taking all solutions in a 1cm well-Stoppard quartz cuvette.

**X-ray Diffraction (XRD) Study:** XRD pattern of the all samples were documented on a Philips PW-1710 X-ray diffractrometer (40 kV, 20 mA) with Cu  $K\alpha$  radiation ( $\lambda = 1.5418 \text{ \AA}$ ) in the  $2\theta$  range of  $20^\circ$ - $80^\circ$  at a scanning rate of  $0.5^\circ \text{ min}^{-1}$ . All XRD data were scrutinized using *JCPDS* software.

**X-ray photoelectron spectroscopy (XPS):** Phase purity of the samples were confirmed with use of VG Scientific ESCALAB MK II spectrometer (UK) equipped with an Mg  $K\alpha$  excitation source (1253.6 eV) and a five-channeltron detection system.

**Fourier Transform Infrared Spectroscopy (FTIR):** Fourier transform infrared spectroscopy (FTIR) spectral analysis of the samples were carried out with Nexus 870 Thermo-Nicolet instrument coupled with a Thermo-Nicolet Continuum FTIR Microscope.

**Field-Emission Scanning Electron Microscopy (FESEM):** The morphology of the product were analyzed in detailed by Field Emission Scanning Electron Microscopy (FESEM) using a (Supra 40, Carl Zeiss Pvt. Ltd.) microscope at an accelerating voltage of 20 kV and compositional analysis of the sample was done with an energy dispersive X-ray micro analyzer (OXFORD ISI 300 EDAX) attached to the scanning electron microscope.

**Transmission Electron Microscopy (TEM):** TEM analyses of the samples were performed on a Hitachi H-9000 NAR transmission electron microscope, operating at 100 kV on a carbon coated copper grid.

**Gas Sorption Measurement:** The nitrogen gas adsorption and desorption measurements were executed at 77 K using a Quantachrome Autosorb Automated Gas Sorption analyzer. For adsorption study the sample was dried in vacuum for overnight and 20-25 mg amount was loaded in a 6 mm sample holder. In desorption study the sample was used for degassing at 70°C for 2 h and Brunauer–Emmett–Teller (BET) calculations were performed for the analysis of surface area of the sample. Barrett-Joyner-Halenda (BJH) calculations were implemented for the pore-size distribution calculation after the samples were degassed in a vacuum overnight.

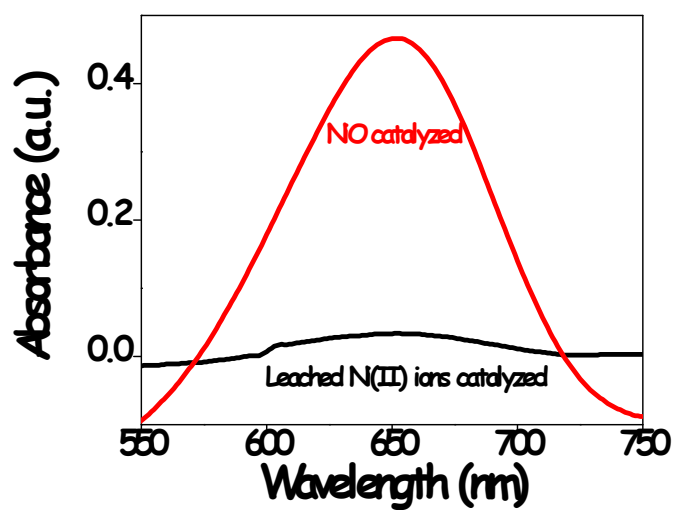

**Fig. S1** Comparison of absorbance spectra of NiO and leached Ni(II) catalyzed TMB oxidation in presences of  $\text{H}_2\text{O}_2$

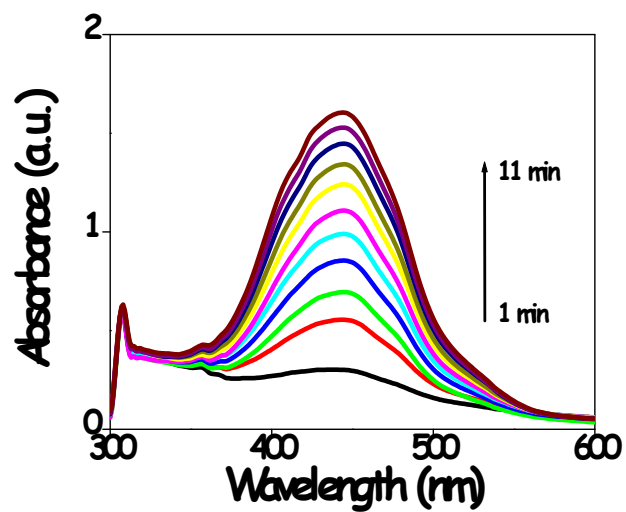

**Fig. S2** Time dependent absorbance spectra of OPDA- $\text{H}_2\text{O}_2$  system in presence of NiO as catalyst

**Table S1.** Kinetic Parameters for the Peroxidase-Like Activity of Ni(OH)<sub>2</sub> NFs , NiO NFs, and HRP enzyme

| Materials           | Substrate                     | K <sub>m</sub> (mM) | V <sub>max</sub> (Ms <sup>-1</sup> ) |
|---------------------|-------------------------------|---------------------|--------------------------------------|
| NiO                 | TMB                           | 0.018               | $2.4 \times 10^{-8}$                 |
|                     | H <sub>2</sub> O <sub>2</sub> | 1.77                | $2.1 \times 10^{-8}$                 |
| Ni(OH) <sub>2</sub> | TMB                           | 0.023               | $1.4 \times 10^{-8}$                 |
|                     | H <sub>2</sub> O <sub>2</sub> | 1.76                | $1.2 \times 10^{-8}$                 |
| HRP <sup>40</sup>   | TMB                           | 0.062               | $3.6 \times 10^{-8}$                 |
|                     | H <sub>2</sub> O <sub>2</sub> | 3.7                 | $8.7 \times 10^{-8}$                 |
